# Supplementary material for: Body mass index and stroke incidence in Japanese community residents: The Jichi Medical School (JMS) Cohort Study
Source: PubMed Central journal article supplement (PMC5498403; doi:10.1016/j.je.2016.08.007), 2017-03-07
Supplement: mmc1.pdf [file mmc1.pdf]

**eTable 1.** Hazard ratios for stroke incidence when body mass index is used as a continuous variable

|                             | Men                  | Women                |
|-----------------------------|----------------------|----------------------|
| Person-years                | 40,940               | 65,983               |
| <b>All-stroke</b>           |                      |                      |
| Number of cases             | 181                  | 172                  |
| Incidence rate <sup>a</sup> | 442                  | 260                  |
| HR1 (95% CI)                | 1.01 ( 0.98 - 1.07 ) | 1.05 ( 1.01 - 1.10 ) |
| HR2 (95% CI)                | 0.96 ( 0.90 - 1.01 ) | 1.01 ( 0.96 - 1.07 ) |
| <b>Cerebral infarction</b>  |                      |                      |
| Number of cases             | 129                  | 91                   |
| Incidence rate <sup>a</sup> | 315                  | 137                  |
| HR1 (95% CI)                | 1.04 ( 0.98 - 1.10 ) | 1.06 ( 0.99 - 1.12 ) |
| HR2 (95% CI)                | 0.97 ( 0.91 - 1.04 ) | 1.02 ( 0.95 - 1.09 ) |
| <b>Cerebral hemorrhage</b>  |                      |                      |
| Number of cases             | 39                   | 43                   |
| Incidence rate <sup>a</sup> | 95                   | 65                   |
| HR1 (95% CI)                | 0.95 ( 0.85 - 1.06 ) | 1.06 ( 0.98 - 1.16 ) |
| HR2 (95% CI)                | 0.86 ( 0.75 - 0.99 ) | 1.06 ( 0.95 - 1.17 ) |

CI, confidence interval; HR, hazard ratio.

HR1: Hazard ratios adjusted for age.

HR2: Hazard ratios adjusted for age, systolic blood pressure, total cholesterol, high-density lipoprotein cholesterol, triglycerides, diabetes mellitus, smoking, and alcohol consumption.

<sup>a</sup>per 100,000 person-years
